# Supplementary material
Source: publisher site journal article supplement (https://www.dovepress.com/article/334205)
Supplement: Supplementary file 1 [file get_supplementary_file.php]

Supplementary Table 1. NGS sequencing analysis of gene mutations.

| Gene | Alterations | Nucleotide change | Plasma | Lung |
| --- | --- | --- | --- | --- |
| *AKT1* | Missense | c.49G＞A | 33.5% | 45.1% |
| *AR* | Deletion | c.*612_2173+34del | - | 75.9% |

-: not detected. Each mutation is shown as the mutant allele frequency.

Supplementary Table 2. The dosage and usage of therapeutic drugs.

| Drugs | Dosage |
| --- | --- |
| Goserelin | 3.6mg every four weeks |
| Flutamide | 250mg three times a day |
| Docetaxel | 75mg/m2 every three weeks |
| Zoledronic acid | 4mg every four weeks |
| Bicalutamide | 50mg once a day |
| Abiraterone | 1000mg once a day |
| Prednisone | 5mg twice a day |
| Carboplatin | AUC (area under the curve) 5 |
| Enzalutamide | 160mg once a day |
| Olaparib | 300mg twice a day |
| Everolimus | 10mg once a day |
